# Supplementary material for: Analysis of the combined and single effects of LULC and climate change on the streamflow of the Upper Blue Nile River Basin (UBNRB): Using statistical trend tests, remote sensing landcover maps and the SWAT model
Source: Copernicus journal article supplement (doi:10.5194/hess-2017-685), 2017-12-19
Supplement: Supplementary file [file hess-2017-685-AC2-supplement.pdf]

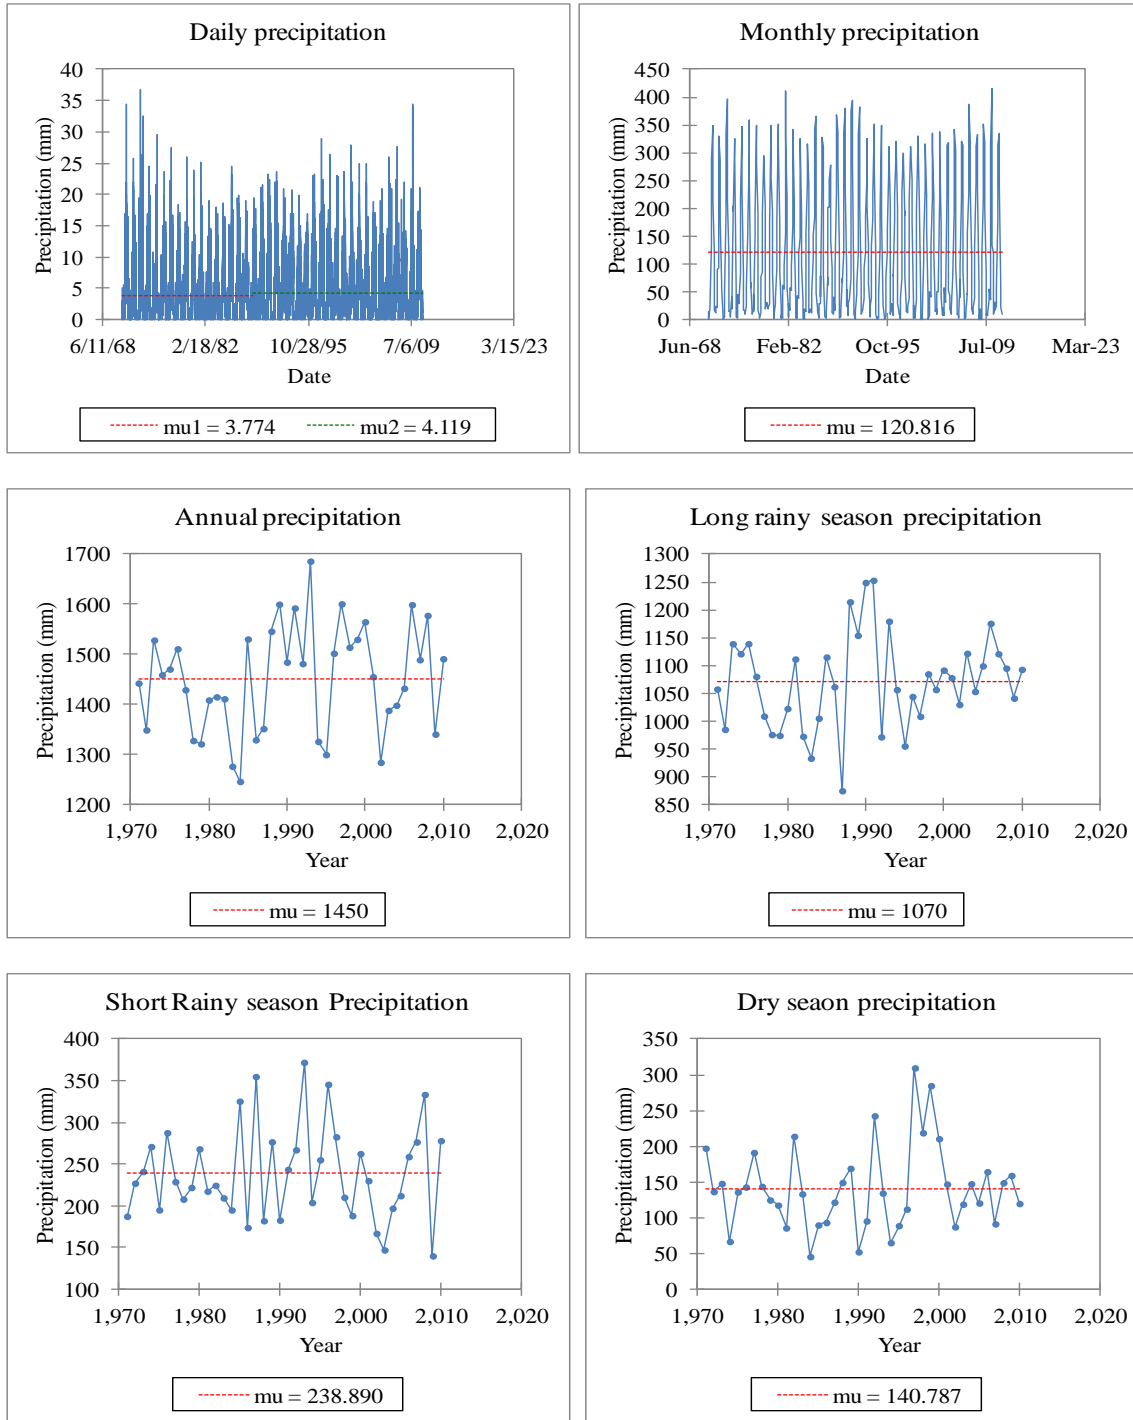

Figure S01: Pettitt change point detection test for precipitation at different time scales

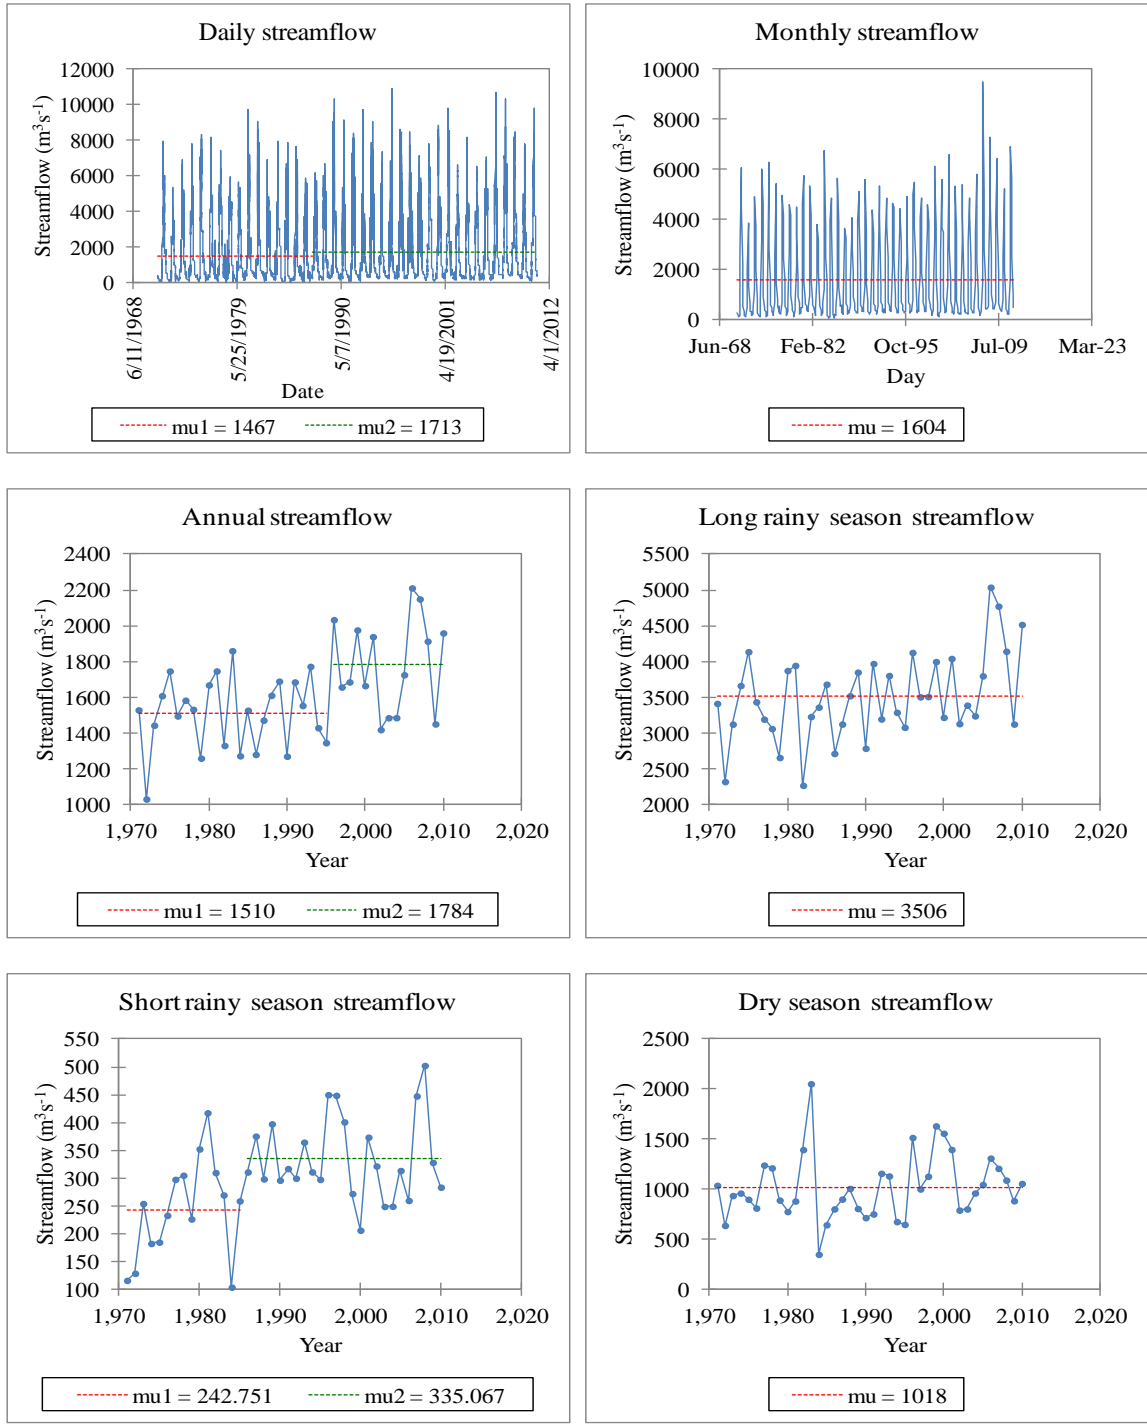

Figure S02: Pettitt change point detection test for streamflow at different time scales

Table3: MK and Pettitt test for the rainfall and streamflow of UBNRB after TFPW at different time scale

| Time scale | Flow     |          |             |              |              | Rainfall |         |             |              |              |
|------------|----------|----------|-------------|--------------|--------------|----------|---------|-------------|--------------|--------------|
|            | p-value  |          | Sen's slope | Change point | Pettitt test | p-value  |         | Sen's slope | Change point | Pettitt test |
|            | After*   | Before*  |             |              |              | After*   | Before* |             |              |              |
| Daily      | < 0.0001 | < 0.0001 | 0.013       | 1987         | Increasing   | 0.387    | 0.953   | 0.000       | 1988         | Increasing   |
| Monthly    | < 0.0001 | 0.031    | 0.378       | 1987         | No change    | 0.010    | 0.640   | 0.009       | 1988         | No change    |
| annually   | < 0.0001 | 0.009    | 9.619       | 1995         | Increasing   | 0.006    | 0.260   | 1.886       | 1987         | No change    |
| Kiremit    | < 0.0001 | 0.014    | 20.30       | 1995         | Increasing   | 0.010    | 0.348   | 1.364       | 1987         | No change    |
| Belg       | < 0.0001 | 0.004    | 3.593       | 1985         | Increasing   | 0.822    | 0.935   | 0.068       | 1997         | No change    |
| Bega       | 0.000    | 0.214    | 4.832       | 1995         | No change    | 0.527    | 0.755   | 0.169       | 1996         | No change    |

Table6: Statistical performance measure values of the SWAT model

| Period |                         | R <sup>2</sup> | NSE  | RVE (%) |
|--------|-------------------------|----------------|------|---------|
|        | Calibration (1973-1977) | 0.79           | 0.74 | -3.41   |
| 1970s  | Validation (1978-1980)  | 0.84           | 0.83 | 7.18    |
|        | Calibration (1983-1987) | 0.80           | 0.74 | -0.72   |
| 1980s  | Validation (1988-19909) | 0.86           | 0.82 | 0.73    |
|        | Calibration (1993-1997) | 0.91           | 0.91 | 1.79    |
| 1990s  | Validation (1998-2000)  | 0.87           | 0.84 | -3.56   |
|        | Calibration (2003-2007) | 0.86           | 0.86 | 3.99    |
| 2000s  | Validation (2008-2010)  | 0.94           | 0.92 | -7.51   |

Table8: Water balance components analysis in the Upper Blue Nile River Basin (mm/year) by considering LULC and climate change over respective periods. All streamflow estimates are for El Diem station.

| Water balance components | 1970s  | 1980s  | 1990s  | 2000s  |
|--------------------------|--------|--------|--------|--------|
| Surface flow (Qs)        | 112.8  | 143.4  | 168.6  | 141.4  |
| Lateral flow (Ql)        | 116.8  | 113.35 | 125.9  | 117.6  |
| Base flow (Qb)           | 47.3   | 29.6   | 9.8    | 64.7   |
| Revap                    | 269.2  | 257.2  | 310.6  | 241    |
| PET                      | 1615.1 | 1627.3 | 1614.7 | 1732.9 |
| Ea                       | 871.6  | 852.6  | 904.3  | 885    |
| Precipitation (P)        | 1428.1 | 1397.1 | 1522.2 | 1462.5 |
| Recharge                 | 16.7   | 15     | 16.7   | 16.3   |
| Qt                       | 276.9  | 286.3  | 304.3  | 323.7  |
| Qs/Qt (%)                | 40.7   | 50.1   | 55.4   | 43.7   |
| Qb/Qt (%)                | 17.1   | 10.3   | 3.2    | 20.0   |
| Ea/P (%)                 | 61.0   | 61.0   | 59.4   | 60.5   |
| Qt/P (%)                 | 19.4   | 20.5   | 20.0   | 22.1   |
